# Supplementary material for: The fabrication of Au/Pd plasmonic alloys on UiO-66-NH2: an efficient visible light-induced photocatalyst towards the Suzuki Miyaura coupling reaction under ambient conditions
Source: Royal Society of Chemistry journal article supplement (doi:10.1039/c9cy01431d), 2019-01-01
Supplement: c9cy01431d1.pdf [file c9cy01431d1.pdf]

**Fabrication of Au/Pd plasmonic alloy on UiO-66-NH<sub>2</sub>:**

**An efficient visible light induced photocatalyst towards Suzuki Miyaura coupling  
reaction under ambient conditions**

Satyabrata Subudhi<sup>a</sup>, Sriram Mansingh<sup>a</sup>, Suraj Prakash Tripathy<sup>a</sup>, Ashutosh Mohanty<sup>b</sup>,

Priyabrat Mohapatra<sup>c</sup>, Dharitri Rath<sup>d</sup>, Kulamani Parida<sup>a\*</sup>

<sup>a</sup>Centre for Nano Science and Nanotechnology, Siksha “O” Anusadhan (Deemed to be University), Bhubaneswar-751030, Odisha, India

<sup>b</sup>Department of solid state and structural chemistry unit, IISc Bangalore-560012, India

<sup>c</sup> Department of Chemistry, C.V. Raman College of Engineering, Bhubaneswar- 752 054, Odisha, India.

<sup>d</sup>Department of Chemistry, Rajdhani College, Bhubaneswar-751003, Odisha, India

\* Corresponding author

---

\* Corresponding author

E-mail: [paridakulamani@yahoo.com](mailto:paridakulamani@yahoo.com),

[kulamaniparida@soauniversity.ac.in](mailto:kulamaniparida@soauniversity.ac.in),

Tel. No. +91-674-2351777 Fax. +91-674-2350642

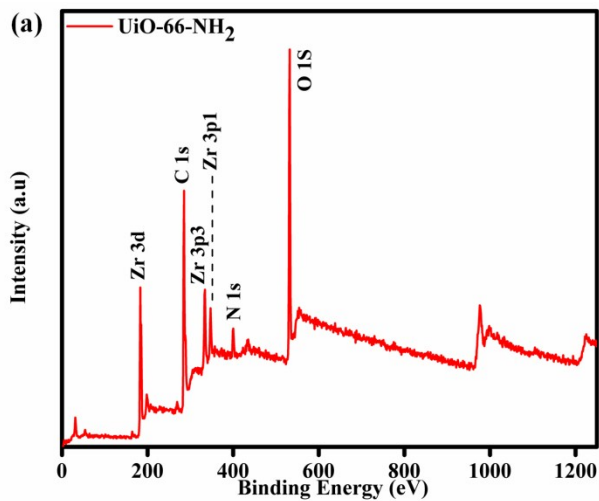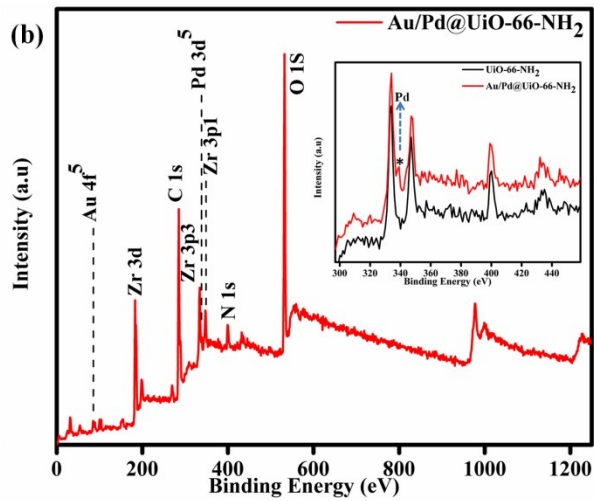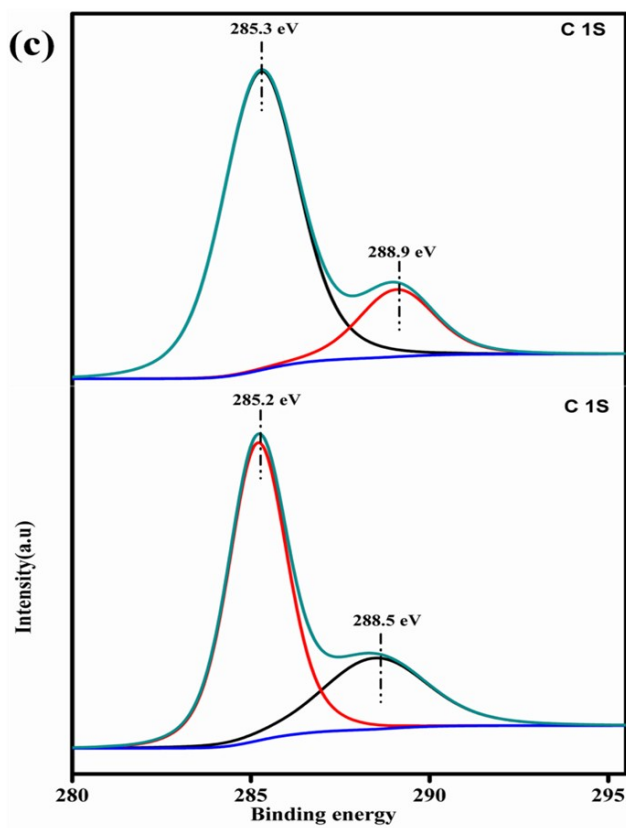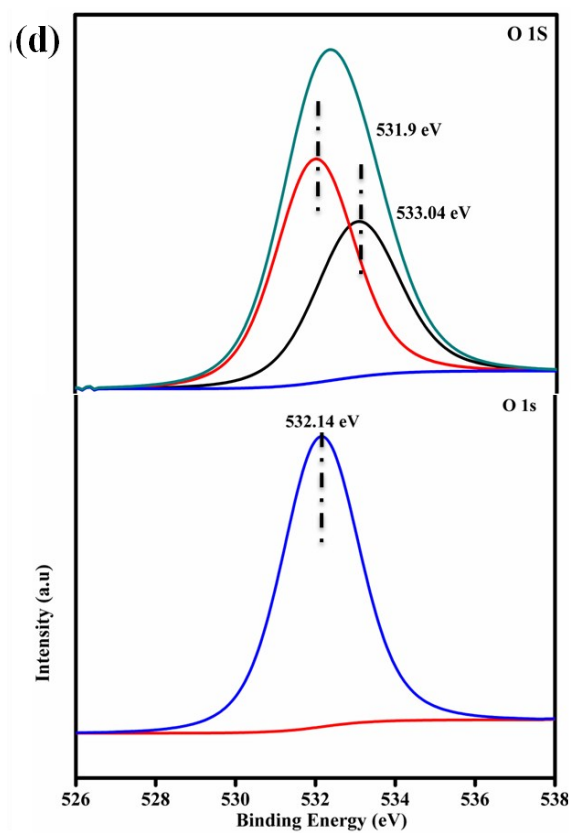

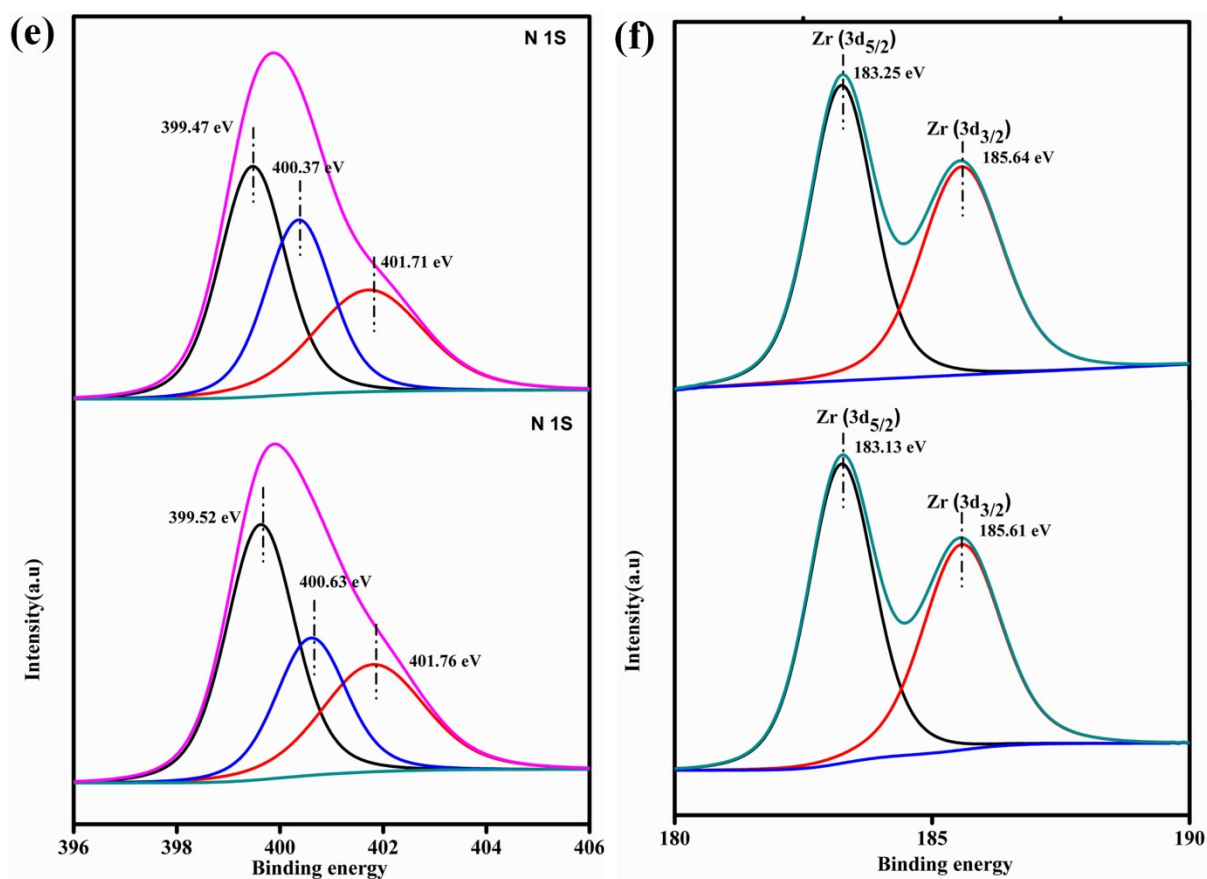

**Figure S1:** XPS spectra of (a) Survey scan of UiO-66-NH<sub>2</sub> (b) Survey scan of Au/Pd@UiO-66-NH<sub>2</sub> (1:2), Comparative XPS peaks of (c) Carbon (d) Oxygen (e) Nitrogen (f) Zirconium (parent/composite)

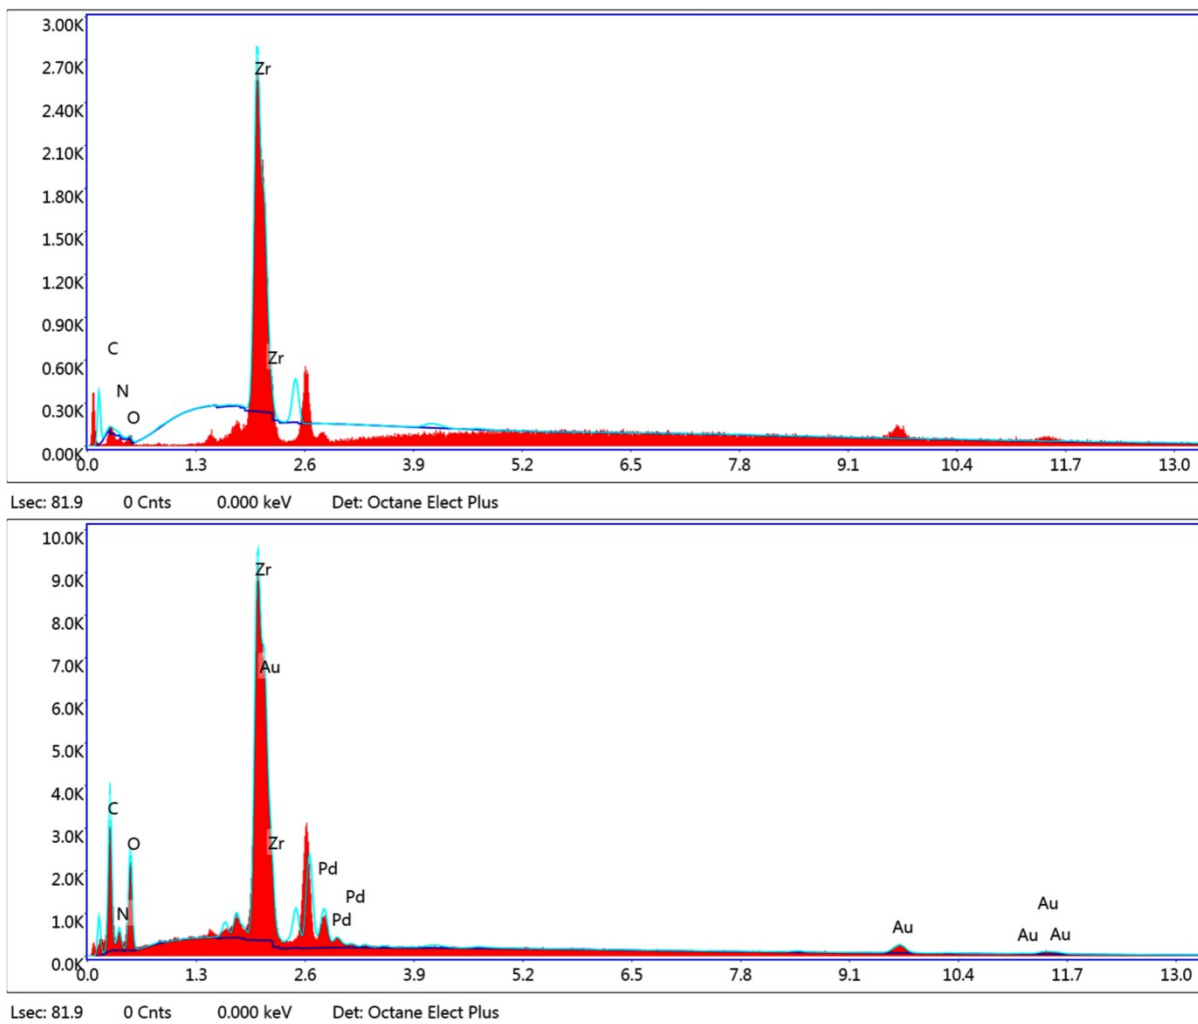

**Figure S2:** (a) EDAX OF UiO-66-NH<sub>2</sub> (b) EDAX OF Au/Pd@UiO-66-NH<sub>2</sub> (1:2)

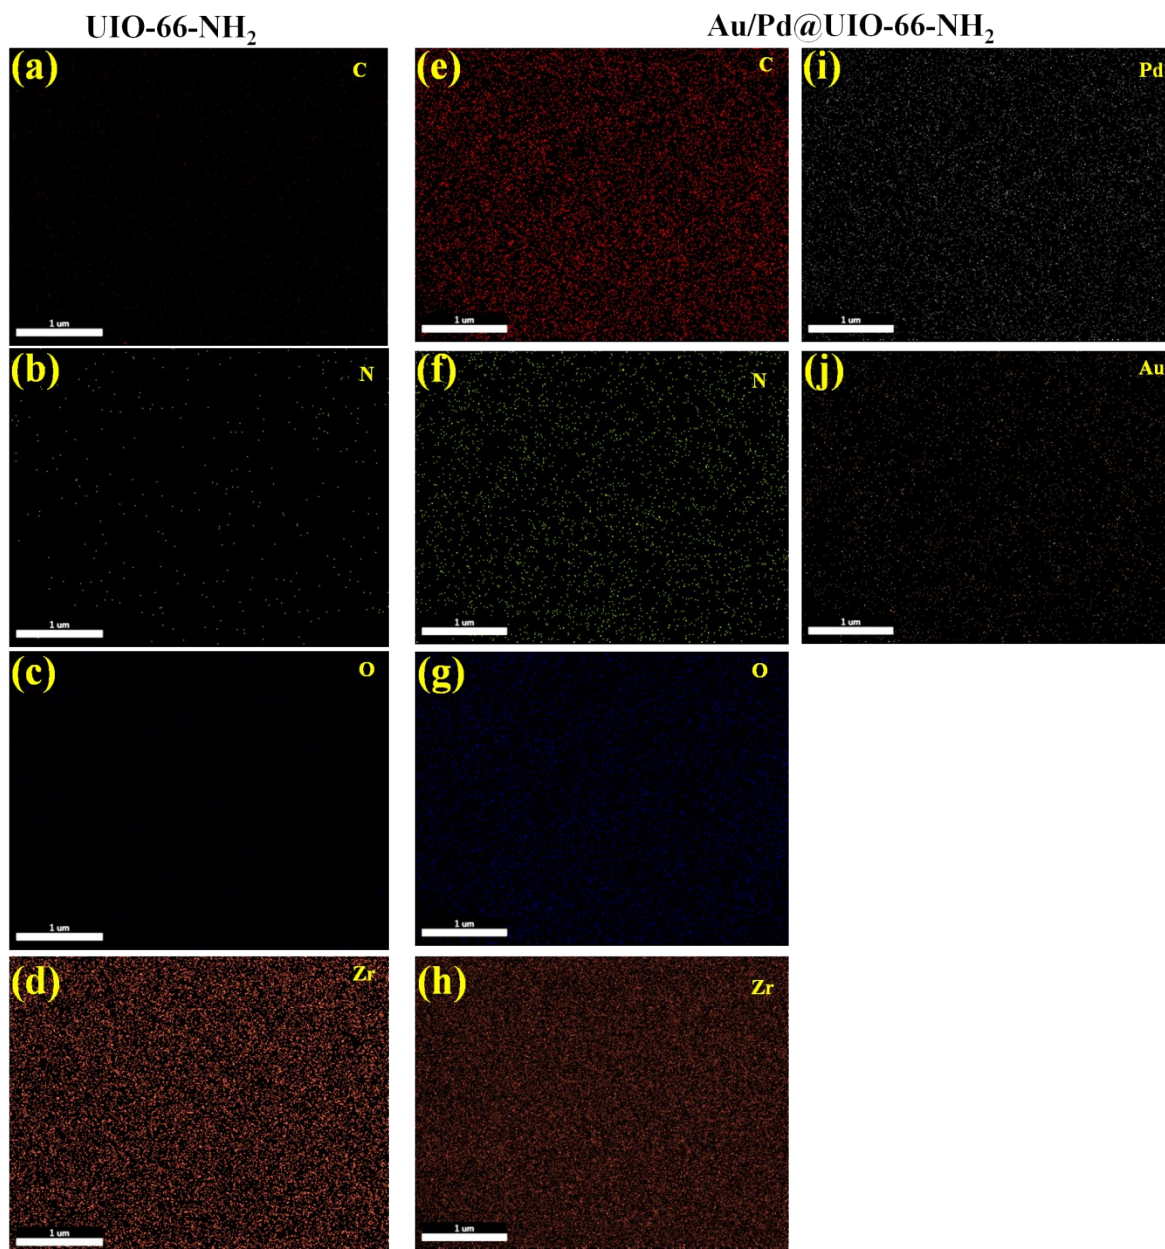

**Figure S3:** Colour mapping of C, N, O, Zr for UiO-66-NH<sub>2</sub> (a-d) and C, N, O, Zr, Au, Pd for Au/Pd@UiO-66-NH<sub>2</sub> (e-h).

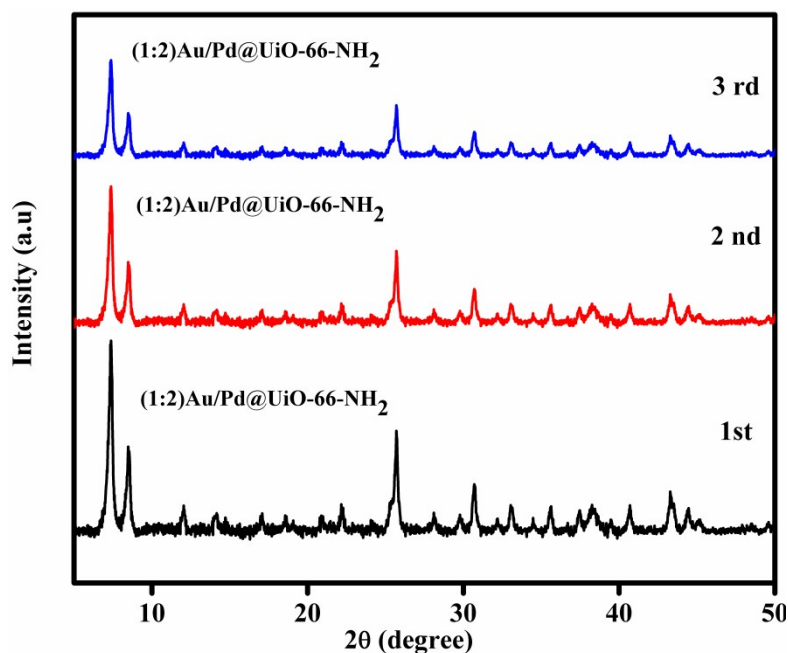

**Figure S4:** Reusability graph

**Table S5:** A comparative analysis of various photocatalyst towards SMC reaction:

| Sl. no | Catalysts/ Dose                                                      | Substrate dose (mmol) (IB/PBA) | Solvent               | Time (mins) | Con. (%) | Yield (%) | Sel. (%) | Ref.      |
|--------|----------------------------------------------------------------------|--------------------------------|-----------------------|-------------|----------|-----------|----------|-----------|
| 1      | Cu <sub>1</sub> Pd <sub>2</sub> @UiO-66-NH <sub>2</sub> (Zr)/ (5 mg) | 0.1/0.2                        | DMF/H <sub>2</sub> O  | 120         | 53       | -         | >99      | 52        |
| 2      | Pd@UiO-66-NH <sub>2</sub> (Zr)/ (5 mg)                               | 0.8/1.6                        | DMF/H <sub>2</sub> O  | 300         | 99       | -         | >99      | 53        |
| 3      | Pd/Au/PN-CeO <sub>2</sub> / (15 mg)                                  | 0.20/0.24                      | DMF/H <sub>2</sub> O  | 30          | 99.1     | -         | 98.1     | 54        |
| 4      | Au/Pd/TiO <sub>2</sub> / (5 mg)                                      | 0.2/0.3                        | EtOH/H <sub>2</sub> O | 300         | -        | 98        | -        | 55        |
| 5      | Pd@B-BO <sub>3</sub> / (10 mg)                                       | 0.5/0.55                       | DMF/H <sub>2</sub> O  | 120         | -        | 98        | -        | 56        |
| 6      | Au/Pd/ZrO <sub>2</sub> / (50 mg)                                     | 1.0/1.5                        | DMF/H <sub>2</sub> O  | 360         | 98       | -         | 99       | 17        |
| 7      | Pd/MoS <sub>2</sub> / (25 mg)                                        | 0.4/0.8                        | EtOH/H <sub>2</sub> O | 120         | -        | 50.3      | -        | 57        |
| 8      | Pd/Au@SiO <sub>2</sub> (20 mg)                                       | 0.3/0.2                        | DMF/H <sub>2</sub> O  | 30          | -        | 78        | -        | 48        |
| 9      | Au/Pd@UiO-66-NH <sub>2</sub> (Zr)/ 20 mg                             | 1.0/2.0                        | DMF/H <sub>2</sub> O  | 60          | 98       | -         | >99      | This work |
|        |                                                                      |                                | EtOH/H <sub>2</sub> O | 60          | 99       | -         |          |           |

### **References:**

- 52 D. Sun, M. Xu, Y. Jiang, J. Long, and Z. Li, *Small Methods*, 2018, **2**, 1800164.
- 53 D. Sun, and Z. Li, *The Journal of Physical Chemistry C*, 2016, **120**, 19744-19750.
- 54 S. Zhang, C. Chang, Z. Huang, Y. Ma, W. Gao, J. Li, and Y. Qu, *ACS Catalysis*, 2015, **5**, 6481-6488.
- 55 D. Han, Z. Bao, H. Xing, Y. Yang, Q. Ren, and Z. Zhang, *Nanoscale*, 2017, **9**, 6026-6032.

56 Z.J. Wang, S. Ghasimi, K. Landfester, and K.A. Zhang, *Chemistry of Materials*, 2015, **27**, 1921-1924.

57 H.H. Shin, E. Kang, H. Park, T. Han, C.H. Lee, and D.K. Lim, *Journal of Materials Chemistry A*, 2017, **5**, 24965-24971.
